# Supplementary material
Source: MDPI journal article supplement (https://www.mdpi.com/1424-8247/16/9/1221)
Supplement: s1 [file s1]

Supplementary Information to:

# OR2H2 Activates CAMKK $\beta$ –AMPK–Autophagy Signaling Axis and Suppresses Senescence in VK2/E6E7 Cells

Ji Min Kim <sup>1,†</sup>, Sina Dziobaka <sup>2,†</sup>, Ye Eun Yoon <sup>1,†</sup>, Ha Lim Lee <sup>1</sup>, Ji Hyun Jeong <sup>1</sup>, In-Ryeong Lee <sup>1</sup>, Daniel Weidinger <sup>2</sup>, Changwon Yang <sup>1,3</sup>, Deokho Kim <sup>1,3</sup>, Yalcin Gulperi <sup>1,3</sup>, Cheol-Koo Lee <sup>1,3</sup>, Jeongwon Sohn <sup>4,5</sup>, Gwonhwa Song <sup>1,3</sup>, Hanns Hatt <sup>2,\*</sup> and Sung-Joon Lee <sup>6,7,8,\*</sup>

1 Department of Biotechnology, School of Life Science and Biotechnology for BK21 PLUS, Korea University, Seoul 02855, Republic of Korea; jamiekim19@gmail.com (J.M.K.); yeeun916@korea.ac.kr (Y.E.Y.); hagurim94@naver.com (H.L.L.); embroider13@naver.com (J.H.J.); lee3231817@naver.com (I.-R.L.); ycw117@korea.ac.kr (C.Y.); mzxcmz@naver.com (D.K.); gulperiyalcin@korea.ac.kr (Y.G.); cklee2005@korea.ac.kr (C.-K.L.)

2 Department of Cell Physiology, Ruhr-University Bochum, 44791 Bochum, Germany; sina.dziobaka@rub.de (S.D.); daniel.weidinger@rub.de (D.W.)

3 Division of Biotechnology, College of Life Sciences and Biotechnology, Korea University, Seoul 02855, Republic of Korea

4 Department of Biochemistry and Molecular Biology, Korea University College of Medicine, Seoul 02842, Republic of Korea; biojs@korea.ac.kr

5 Korea Institute of Molecular Medicine and Nutrition, Seoul 02842, Republic of Korea

6 Department of Food Bioscience and Technology, College of Life Sciences and Biotechnology, Korea University, Seoul 02855, Republic of Korea

7 Interdisciplinary Program in Precision Public Health, Korea University, Seoul 02846, Republic of Korea

8 BK21 Four Institute of Precision Public Health, Korea University, Seoul 02846, Republic of Korea

\* Correspondence: hanns.hatt@rub.de (H.H.); junelee@korea.ac.kr (S.-J.L.)

† These authors contributed equally to this work.

**Table S1.** qPCR primers

| <b>Gene</b> | <b>Forward 5'-3'</b>  | <b>Reverse 3'-5'</b>  | <b>Product size (bp)</b> |
|-------------|-----------------------|-----------------------|--------------------------|
| OR2H2       | GGTCCCAGCTCTAATTCGACT | CACTGCCCAGGTAATGGCTC  | 136                      |
| OR2H1       | TGCAAGAACTGAACCGACCA  | ACCTCACATTGGTGCCTCTG  | 194                      |
| OR51E1      | GATTGTCCATGGTGCATCGC  | TGCGCTGTCGAATCTCCTTT  | 138                      |
| OR51E2      | CATATTTGCAAGCTCGGCCC  | GGCATGTGTGAAGTTGCAGG  | 172                      |
| OR1D2       | AGAGCAGTGGGACTTTTGGT  | GCCAGGAAGAAGTACACGGG  | 251                      |
| OR2J3       | GCATGTATCTCCAGCCACCA  | CATACACAGGCTCATTCCCAC | 169                      |
| OR2B6       | CAGATCGACCTTGGCTGGAG  | GGGCTACACAGCCACGATAA  | 246                      |
| OR2A4/7     | TCCTACAGCCCCCTTCTAGG  | GGAATGCCGATCCATGATGA  | 215                      |

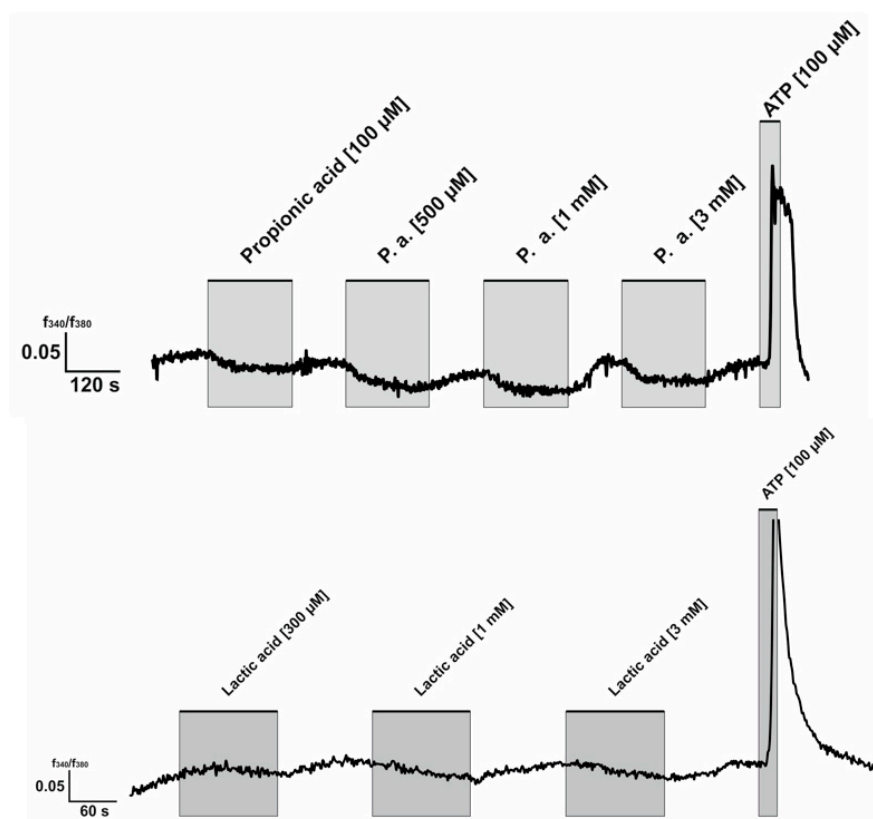

**Figure S1.** Intracellular  $\text{Ca}^{2+}$  response upon propionic acid (100, 500  $\mu\text{M}$  and 1, 3 mM) and lactic acid (300  $\mu\text{M}$  and 1, 3 mM) stimulation. Application time was labeled by the grey square. ATP (100  $\mu\text{M}$ ) was applied as a positive control.

**a**

### Phospho-kinase array

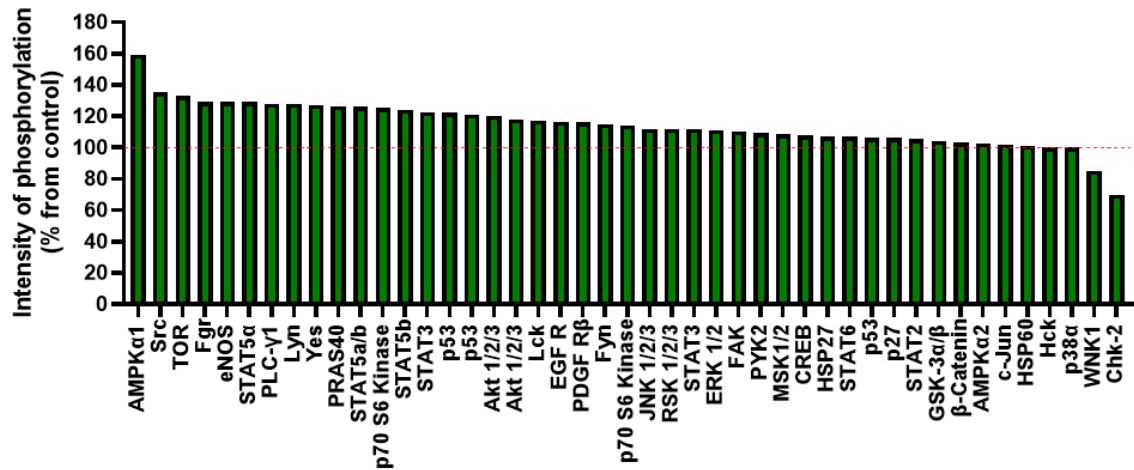

**b**

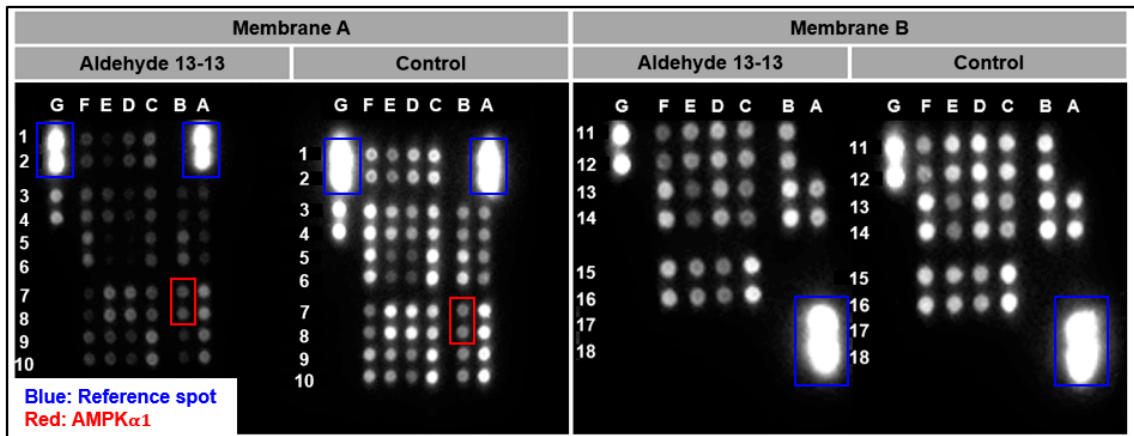

| Membrane A |        |                |                      |
|------------|--------|----------------|----------------------|
| Row        | Column | Target         | Phosphorylation site |
| 1          | A      | Reference spot | -                    |
| 1          | B      | -              | -                    |
| 1          | C      | TOR            | S2448                |
| 1          | D      | Src            | Y419                 |
| 1          | E      | Fyn            | Y420                 |
| 1          | F      | Hck            | Y411                 |
| 1          | G      | Reference spot | -                    |
| 2          | A      | Reference spot | -                    |
| 2          | B      | -              | -                    |
| 2          | C      | TOR            | S2448                |
| 2          | D      | Src            | Y419                 |
| 2          | E      | Fyn            | Y420                 |
| 2          | F      | Hck            | Y411                 |
| 2          | G      | Reference spot | -                    |
| 3          | A      | p38α           | T180/Y182            |
| 3          | B      | EGF R          | Y1086                |
| 3          | C      | CREB           | S133                 |

|   |   |                          |                      |
|---|---|--------------------------|----------------------|
| 3 | D | Lyn                      | Y397                 |
| 3 | E | Yes                      | Y426                 |
| 3 | F | Chk-2                    | T68                  |
| 3 | G | PRAS40                   | T246                 |
| 4 | A | p38 $\alpha$             | T180/Y182            |
| 4 | B | EGF R                    | Y1086                |
| 4 | C | CREB                     | S133                 |
| 4 | D | Lyn                      | Y397                 |
| 4 | E | Yes                      | Y426                 |
| 4 | F | Chk-2                    | T68                  |
| 4 | G | PRAS40                   | T246                 |
| 5 | A | ERK1/2                   | T202/Y204, T185/Y187 |
| 5 | B | MSK1/2                   | S376/S360            |
| 5 | C | HSP27                    | S78/S82              |
| 5 | D | Lck                      | Y394                 |
| 5 | E | Fgr                      | Y412                 |
| 5 | F | FAK                      | Y397                 |
| 5 | G | -                        | -                    |
| 6 | A | ERK1/2                   | T202/Y204, T185/Y187 |
| 6 | B | MSK1/2                   | S376/S360            |
| 6 | C | HSP27                    | S78/S82              |
| 6 | D | Lck                      | Y394                 |
| 6 | E | Fgr                      | Y412                 |
| 6 | F | FAK                      | Y397                 |
| 6 | G | -                        | -                    |
| 7 | A | JNK1/2/3                 | T183/Y185, T221/Y223 |
| 7 | B | AMPK $\alpha$ 1          | T183                 |
| 7 | C | AMPK $\alpha$ 2          | T172                 |
| 7 | D | STAT2                    | Y689                 |
| 7 | E | STAT6                    | Y641                 |
| 7 | F | PDGF R $\beta$           | Y751                 |
| 7 | G | -                        | -                    |
| 8 | A | JNK1/2/3                 | T183/Y185, T221/Y223 |
| 8 | B | AMPK $\alpha$ 1          | T183                 |
| 8 | C | AMPK $\alpha$ 2          | T172                 |
| 8 | D | STAT2                    | Y689                 |
| 8 | E | STAT6                    | Y641                 |
| 8 | F | PDGF R $\beta$           | Y751                 |
| 8 | G | -                        | -                    |
| 9 | A | GSK-3 $\alpha$ / $\beta$ | S21/S9               |
| 9 | B | Akt1/2/3                 | S473                 |
| 9 | C | $\beta$ -Catenin         | -                    |
| 9 | D | STAT5 $\alpha$           | Y694                 |
| 9 | E | STAT5 $\beta$            | Y699                 |
| 9 | F | STAT5 $\alpha$ / $\beta$ | Y694/Y699            |

|                   |               |                          |                             |
|-------------------|---------------|--------------------------|-----------------------------|
| 9                 | G             | PBS (Negative control)   | -                           |
| 10                | A             | GSK-3 $\alpha$ / $\beta$ | S21/S9                      |
| 10                | B             | Akt1/2/3                 | S473                        |
| 10                | C             | $\beta$ -Catenin         | -                           |
| 10                | D             | STAT5 $\alpha$           | Y694                        |
| 10                | E             | STAT5 $\beta$            | Y699                        |
| 10                | F             | STAT5 $\alpha$ / $\beta$ | Y694/Y699                   |
| 10                | G             | PBS (Negative control)   | -                           |
| <b>Membrane B</b> |               |                          |                             |
| <b>Row</b>        | <b>Column</b> | <b>Target</b>            | <b>Phosphorylation site</b> |
| 11                | A             | -                        | -                           |
| 11                | B             | Akt1/2/3                 | T308                        |
| 11                | C             | p70 S6 Kinase            | T389                        |
| 11                | D             | p70 S6 Kinase            | T421/S424                   |
| 11                | E             | STAT3                    | Y705                        |
| 11                | F             | STAT3                    | S727                        |
| 11                | G             | HSP60                    | -                           |
| 12                | A             | -                        | -                           |
| 12                | B             | Akt1/2/3                 | T308                        |
| 12                | C             | p70 S6 Kinase            | T389                        |
| 12                | D             | p70 S6 Kinase            | T421/S424                   |
| 12                | E             | STAT3                    | Y705                        |
| 12                | F             | STAT3                    | S727                        |
| 12                | G             | HSP60                    | -                           |
| 13                | A             | p53                      | S392                        |
| 13                | B             | p53                      | S46                         |
| 13                | C             | p53                      | S15                         |
| 13                | D             | RSK1/2/3                 | S380/S386/S377              |
| 13                | E             | p27                      | T198                        |
| 13                | F             | WNK1                     | T60                         |
| 13                | G             | -                        | -                           |
| 14                | A             | p53                      | S392                        |
| 14                | B             | p53                      | S46                         |
| 14                | C             | p53                      | S15                         |
| 14                | D             | RSK1/2/3                 | S380/S386/S377              |
| 14                | E             | p27                      | T198                        |
| 14                | F             | WNK1                     | T60                         |
| 14                | G             | -                        | -                           |
| 15                | A             | -                        | -                           |
| 15                | B             | -                        | -                           |
| 15                | C             | c-Jun                    | S63                         |
| 15                | D             | eNOS                     | S1177                       |
| 15                | E             | PLC- $\gamma$ 1          | Y783                        |
| 15                | F             | PYK2                     | Y402                        |
| 15                | G             | -                        | -                           |

|    |   |                        |       |
|----|---|------------------------|-------|
| 16 | A | -                      | -     |
| 16 | B | -                      | -     |
| 16 | C | c-Jun                  | S63   |
| 16 | D | eNOS                   | S1177 |
| 16 | E | PLC- $\gamma$ 1        | Y783  |
| 16 | F | PYK2                   | Y402  |
| 16 | G | -                      | -     |
| 17 | A | Reference spot         | -     |
| 17 | B | -                      | -     |
| 17 | C | -                      | -     |
| 17 | D | -                      | -     |
| 17 | E | -                      | -     |
| 17 | F | -                      | -     |
| 17 | G | PBS (Negative control) | -     |
| 18 | A | Reference spot         | -     |
| 18 | B | -                      | -     |
| 18 | C | -                      | -     |
| 18 | D | -                      | -     |
| 18 | E | -                      | -     |
| 18 | F | -                      | -     |
| 18 | G | PBS (Negative control) | -     |

**Figure S2. (a)** Results from the phosphokinase array assay in cells treated with aldehyde 13-13. VK2/E6E7 cells were stimulated with 500  $\mu$ M of aldehyde 13-13 for 30 minutes and phosphorylation intensities normalized to the ethanol-treated control and expressed as a percentage increase or decrease. The x-axis represents the 43 different kinases. The signals spots were analyzed with Image J software. **(b)** Image of the whole blot of the phospho-kinase array. Blue box indicates reference spot, red box indicates AMPK $\alpha$ 1. The data table indicates target of each blot and its phosphorylation sites.

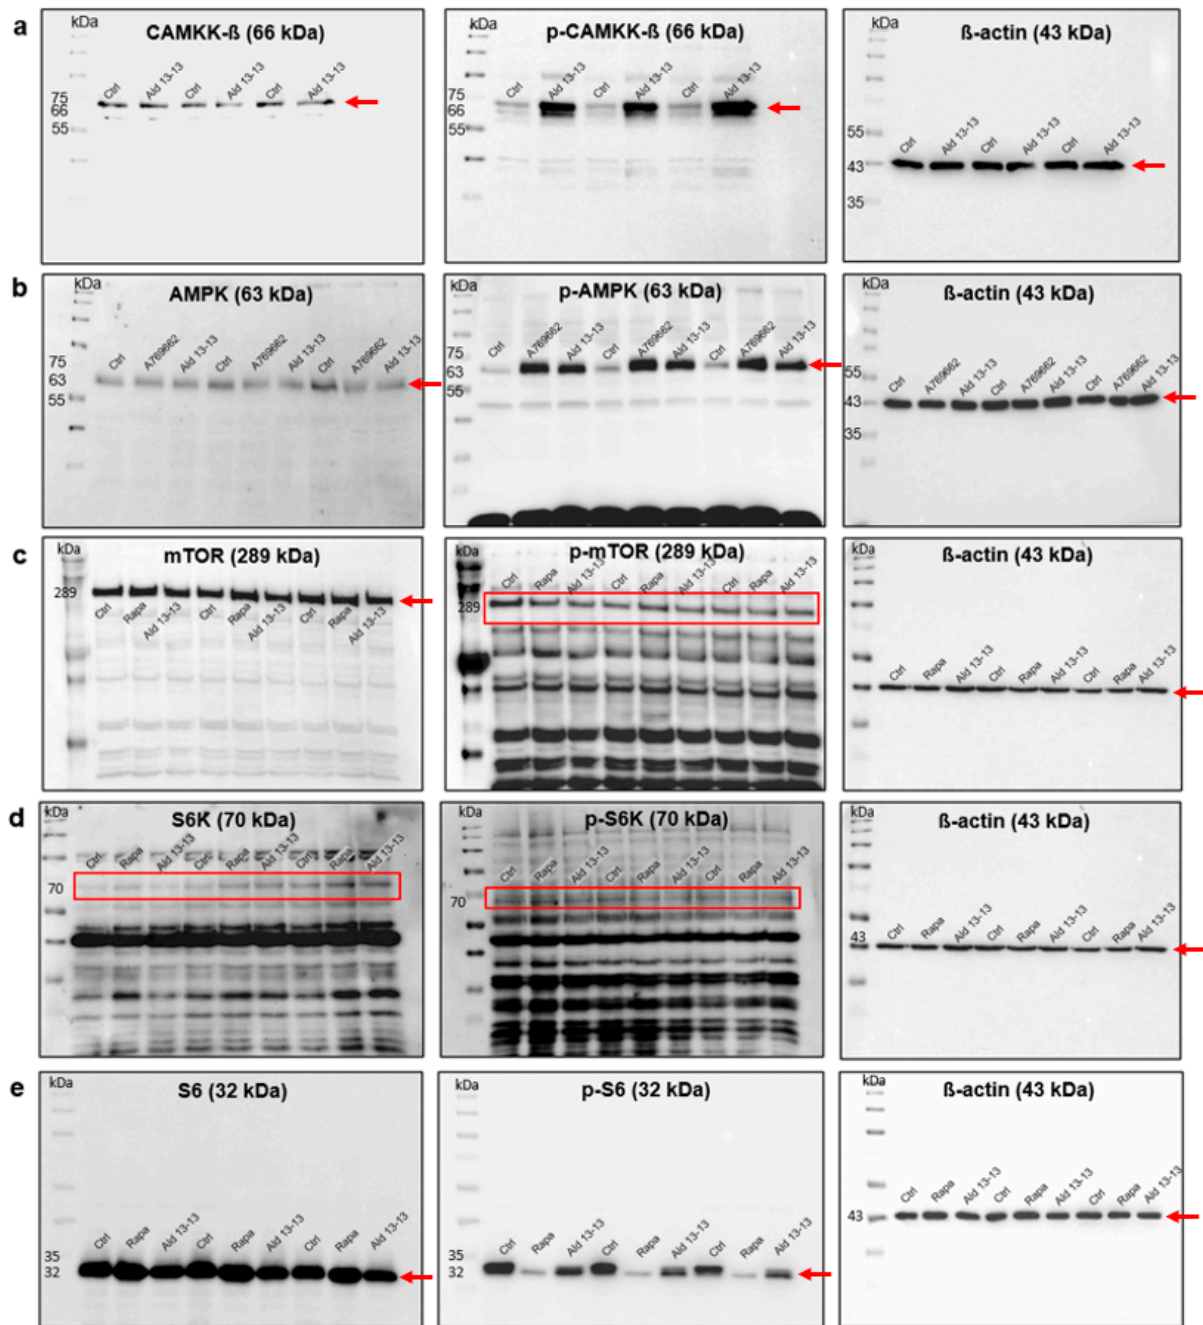

**Figure S3.** Full length uncropped western blot images used to generate Fig 4. (a) CAMKK-β, p-CAMKK-β and β-actin blot respectively. (b) AMPK, p-AMPK and β-actin blot respectively. (c) mTOR, p-mTOR and β-actin blot respectively. (d) S6K, p-S6K and β-actin blot respectively. (e) S6, p-S6 and β-actin blot respectively. Ctrl: control, Ald 13-13: Aldehyde 13-13, A769662: AMPK agonist, Rapa: rapamycin.



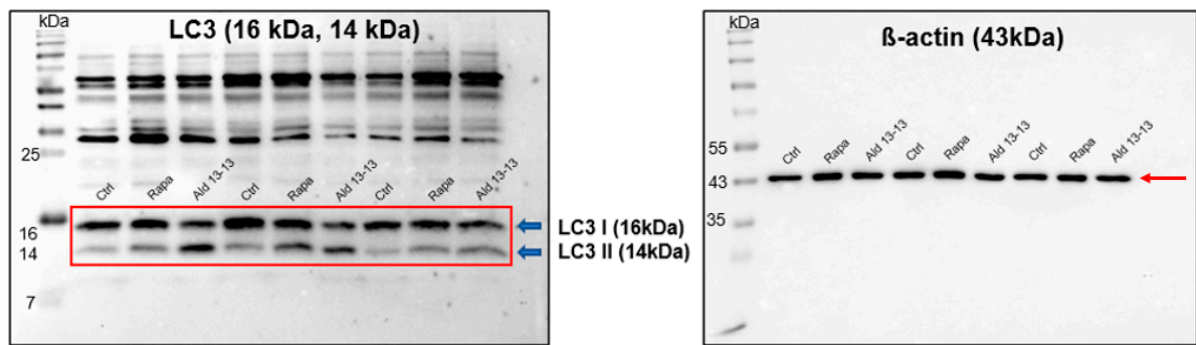

**Figure S4.** Full length uncropped westernblot images used to generate Fig 5a. LC3 I/II and  $\beta$ -actin blot respectively. Ctrl: control, Rapa: rapamycin, Ald 13-13: Aldehyde 13-13.

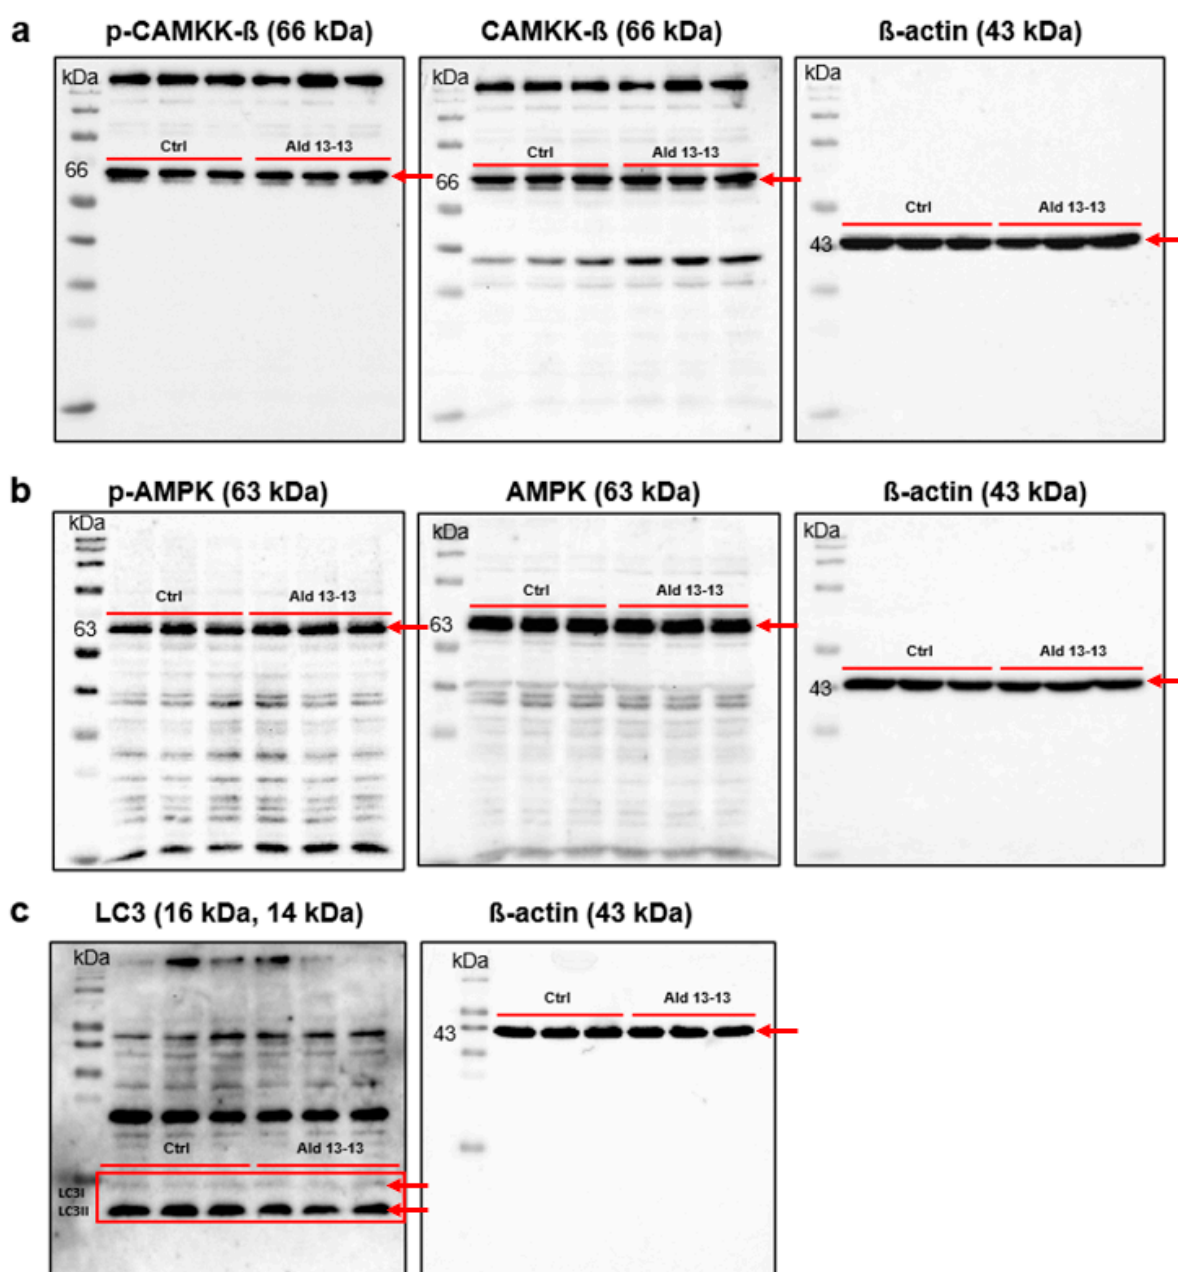

**Figure S5.** Full length uncropped western blot images used to generate Fig 6b-d. **(a)** CAMKK-β, p-CAMKK-β and β-actin blot respectively. **(b)** AMPK, p-AMPK and β-actin blot respectively. **(c)** LC3-I/LC3-II and β-actin blot respectively. Ctrl: control, Ald 13-13: Aldehyde 13-13.

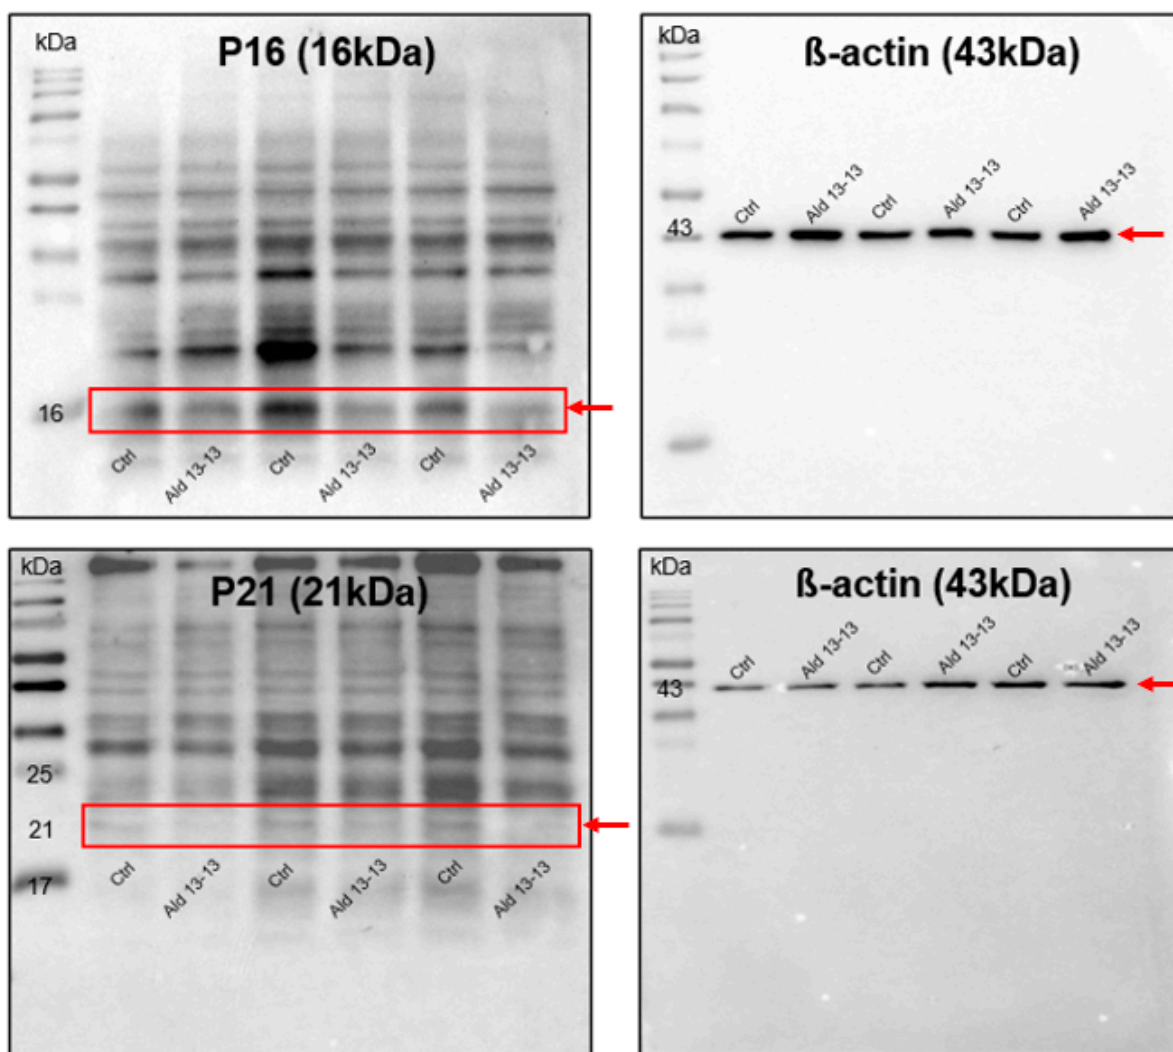

**Figure S6.** Full length uncropped westernblot images used to generate Fig 7b. P16 and its  $\beta$ -actin blot; P21 and its  $\beta$ -actin blot respectively. Ctrl: control, Ald 13-13: Aldehyde 13-13.

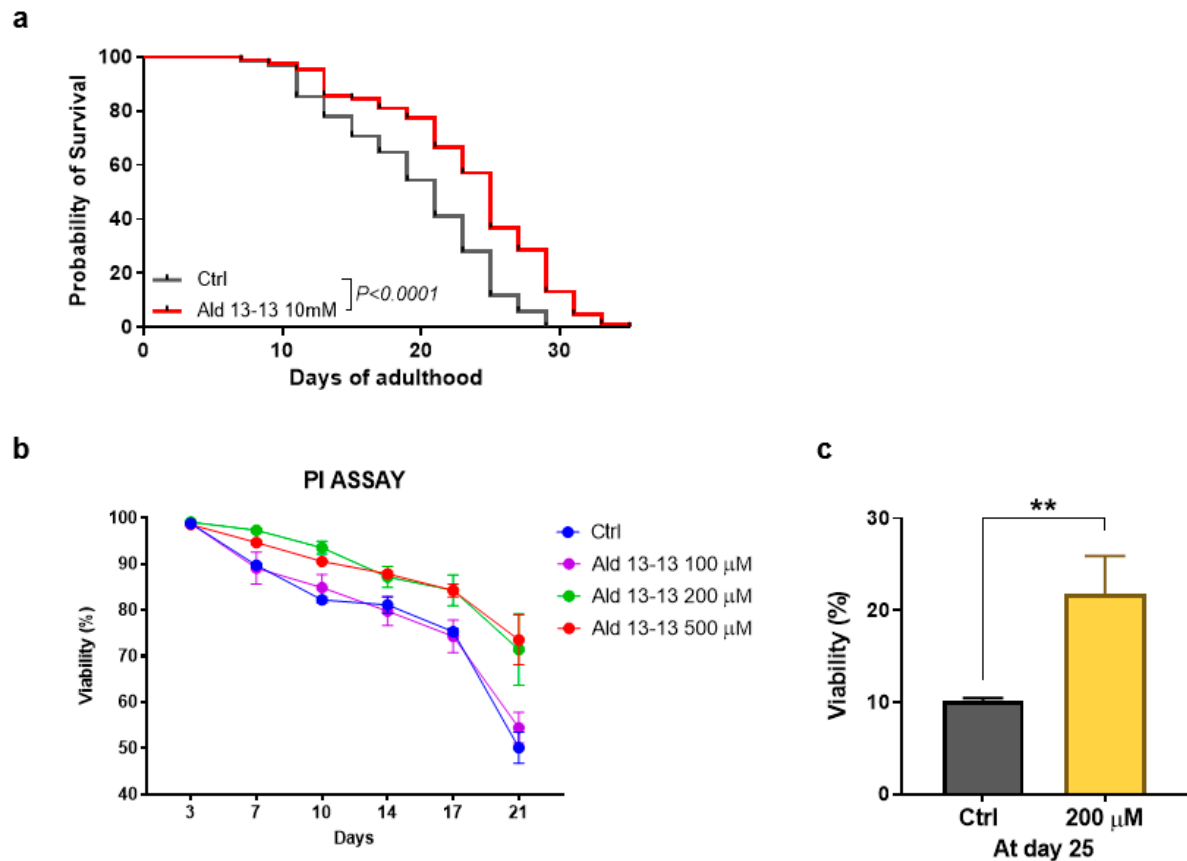

**Figure S7.** Effect of aldehyde 13-13 on the lifespan of *C. elegans* and budding yeast. **(a)** Survival of *C. elegans* (black, control; red, aldehyde 13-13 at 10 mM) **(b)** Cell survival assay of budding yeast assessed by propidium iodine (PI) assay (blue, control; purple, 100  $\mu$ M; green, 200  $\mu$ M; red, 500  $\mu$ M of aldehyde 13-13). One-way ANOVA between control and aldehyde 13-13. 100  $\mu$ M,  $P = 0.4067$ ; 200  $\mu$ M,  $P = 0.0246$ ; 500  $\mu$ M,  $P = 0.0275$ . **(c)** Cell viability of budding yeast at 25 days of experiments. Aldehyde 13-13 (200  $\mu$ M) was compared to vehicle control. Data are means  $\pm$  SEM. A two-tailed unpaired  $t$ -test was performed for multiple or two-group comparisons. \*,  $P < 0.05$ ; \*\*,  $P < 0.01$ ; \*\*\*,  $P < 0.001$ .
